# Supplementary material
Source: HighWire-hosted journal article supplement (http://ajnr-stage2.highwire.org/highwire/filestream/95721/field_highwire_adjunct_files/0/0712.pdf)
Supplement: 0712.pdf [file 0712.pdf]

**Supplementary Table 1.** Imaging features at time of presentation for the ten cases of CNS high-grade neuroepithelial tumor with *BCOR* exon 15 internal tandem duplication.

| Patient ID | tumor location | topography     | laterality | size (APxTRxCC) cm | tumor volume (cm <sup>3</sup> ) | contact dura mater | margins            | peritumoral edema | T1 intensity (wrt cortex) | T2 intensity (wrt cortex) | diffusion restriction | apparent diffusion coefficient (10 <sup>-3</sup> mm <sup>2</sup> /sec) | density (wrt cortex) | Hounsfield unit (wrt cortex 35 HU) | necrosis | calcifications | blood products | central vessel | contrast enhancement intensity | contrast enhancement homogeneity | meningeal dissemination |
|------------|----------------|----------------|------------|--------------------|---------------------------------|--------------------|--------------------|-------------------|---------------------------|---------------------------|-----------------------|------------------------------------------------------------------------|----------------------|------------------------------------|----------|----------------|----------------|----------------|--------------------------------|----------------------------------|-------------------------|
| # 1        | supratentorial | frontoparietal | left       | 8,3 x 6,0 x 7,0    | 181                             | yes                | well circumscribed | no                | hypointense               | hyperintense              | yes                   | NA                                                                     | isodense             | 36                                 | yes      | yes            | yes            | no             | mild                           | heterogeneous                    | no                      |
| # 2        | supratentorial | temporal       | right      | 9,2 x 6,8 x 6,4    | 208                             | yes                | well circumscribed | no                | NA                        | NA                        | NA                    | NA                                                                     | isodense             | 34                                 | yes      | yes            | yes            | yes            | mild                           | heterogeneous                    | NA                      |
| # 3        | infratentorial | hemispheric    | right      | 4,5 x 4,3 x 5,3    | 53                              | yes                | well circumscribed | no                | hypointense               | hyperintense              | yes                   | 0,7                                                                    | NA                   | NA                                 | no       | no             | yes            | yes            | mild to moderate               | heterogeneous                    | no                      |
| # 4        | supratentorial | temporal       | left       | 4,9 x 4,0 x 3,8    | 39                              | yes                | well circumscribed | no                | hypointense               | hyperintense              | yes                   | 0,5                                                                    | isodense             | 34                                 | yes      | yes            | no             | yes            | mild                           | heterogeneous                    | no                      |
| # 5        | supratentorial | frontal        | left       | 8,8 x 7,1 x 6,4    | 208                             | yes                | well circumscribed | no                | hypointense               | hyperintense              | yes                   | 0,6                                                                    | isodense             | 38                                 | yes      | yes            | yes            | yes            | mild                           | heterogeneous                    | NA                      |
| # 6        | infratentorial | hemispheric    | right      | 3,9 x 5,9 x 4,0    | 48                              | yes                | well circumscribed | no                | hypointense               | hyperintense              | yes                   | 0,7                                                                    | NA                   | NA                                 | yes      | NA             | no             | yes            | mild                           | heterogeneous                    | no                      |
| # 7        | supratentorial | fornix         | median     | 4,6 x 3,0 x 6,2    | 45                              | no                 | well circumscribed | no                | hypointense               | hyperintense              | yes                   | NA                                                                     | NA                   | NA                                 | yes      | NA             | yes            | yes            | mild                           | heterogeneous                    | NA                      |
| # 8        | infratentorial | hemispheric    | left       | 4,7 x 3,8 x 3,5    | 33                              | yes                | well circumscribed | no                | hypointense               | hyperintense              | yes                   | 0,7                                                                    | hypodense            | 26                                 | yes      | no             | yes            | yes            | mild                           | heterogeneous                    | no                      |
| # 9        | infratentorial | hemispheric    | right      | 3,6 x 2,7 x 5,2    | 26                              | yes                | well circumscribed | no                | hypointense               | hyperintense              | NA                    | NA                                                                     | hypodense            | NA                                 | yes      | no             | yes            | yes            | mild                           | heterogeneous                    | NA                      |
| # 10       | infratentorial | hemispheric    | right      | 4,3 x 6,1 x 3,5    | 48                              | yes                | well circumscribed | no                | hypointense               | hyperintense              | yes                   | 0,6                                                                    | NA                   | NA                                 | yes      | NA             | yes            | yes            | mild to moderate               | heterogeneous                    | no                      |

The mutation type for all tumors is an internal duplication in tandem with a duplicated sequence size ranging between 63 and 114 pb

Supplementary Table 2 . Comparison of imaging characteristics of brain tumors in young children

|                                   | CNS high-grade neuroepithelial tumor with BCOR ITD | ETMR                | AT/RT               | medulloblastoma                                       | posterior fossa ependymoma    | supra-tentorial ependymoma | pilocytic astrocytoma | high grade glioma   |
|-----------------------------------|----------------------------------------------------|---------------------|---------------------|-------------------------------------------------------|-------------------------------|----------------------------|-----------------------|---------------------|
| tumor volume                      | large                                              | large               | variable            | variable                                              | variable                      | large                      | variable              | variable            |
| tumor location                    | ST and IT                                          | ST and IT           | ST and IT           | IT                                                    | IT                            | ST                         | IT > ST               | ST > IT             |
| tumor topography                  | intraparenchymal, peripheral                       | intraparenchymal    | mostly intra-axial  | cerebellar hemispheres (SHH), midline (group 3 and 4) | 4th ventricle, basal cisterns | intraparenchymal           | intraparenchymal      | intraparenchymal    |
| margins                           | well circumscribed                                 | well circumscribed  | well circumscribed  | well circumscribed                                    | well circumscribed            | well circumscribed         | well circumscribed    | ill-defined margins |
| peritumoral edema                 | no                                                 | little-to-no        | relatively little   | variable                                              | no                            | common                     | variable              | yes                 |
| diffusion (solid portion)         | reduced diffusivity                                | reduced diffusivity | reduced diffusivity | reduced diffusivity                                   | variable                      | reduced diffusivity        | increased diffusivity | variable            |
| enhancement (solid portion)       | weak                                               | absent or weak      | variable            | variable (group 4: minimal/no)                        | non to moderate, heterogenous | variable                   | strong                | strong              |
| necrosis/cysts                    | yes (central)                                      | no                  | yes (cysts)         | common                                                | possible                      | yes                        | yes (cysts)           | yes                 |
| blood products                    | common                                             | no                  | common              | rare                                                  | common                        | common                     | uncommon              | common              |
| calcifications                    | common                                             | common              | possible            | uncommon                                              | common                        | common                     | uncommon              | rare                |
| intratumoral central vessel       | yes                                                | yes                 | no                  | no                                                    | no                            | no                         | no                    | no                  |
| leptomeningeal dissemination at Δ | no                                                 | no                  | yes                 | rare (SHH), yes (group 3 and 4)                       | uncommon                      | uncommon                   | uncommon              | rare                |

ST = supratentorial

IT = infratentorial
